# Supplementary material for: A new look at the structure of the neutral Au18 cluster: hollow versus filled golden cage
Source: Royal Society of Chemistry journal article supplement (doi:10.1039/d2cp05422a), 2023-01-01
Supplement: d2cp05422a1.pdf [file d2cp05422a1.pdf]

## Supplementary Information

### **A new look at the structure of the neutral Au<sub>18</sub> cluster: Hollow versus filled golden cage**

**Pham Vu Nhat,<sup>a,b\*</sup> Nguyen Thanh Si,<sup>a</sup> André Fielicke,<sup>c</sup> Vitaly G. Kiselev,<sup>d,e</sup>  
and Minh Tho Nguyen<sup>f,\*</sup>**

<sup>a)</sup> Department of Chemistry, Can Tho University, Can Tho, Vietnam

<sup>b)</sup> Molecular and Materials Modeling Laboratory, Can Tho University, Can Tho, Vietnam

<sup>c)</sup> Fritz-Haber-Institut der Max-Planck-Gesellschaft, Faradayweg 4–6, Berlin, Germany

<sup>d)</sup> Novosibirsk State University, 1 Pirogova Str., 630090 Novosibirsk, Russia

<sup>e)</sup> Institute of Chemical Kinetics and Combustion SB RAS, 3 Institutskaya Str., 630090 Novosibirsk, Russia

<sup>f)</sup> Institute for Computational Science and Technology (ICST), Ho Chi Minh City, Vietnam. Email: [tho.nm@icst.org.vn](mailto:tho.nm@icst.org.vn)

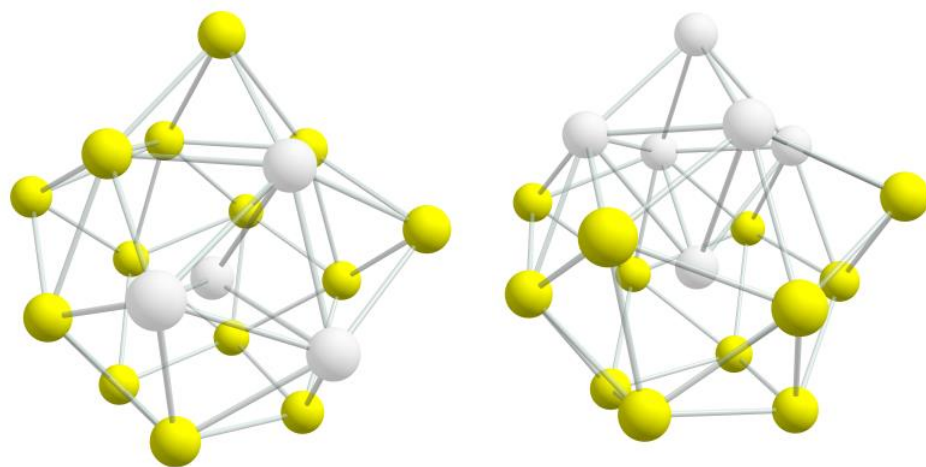

**Figure S1.** Distorted tetrahedral Au<sub>4</sub> (left) and octahedral Au<sub>6</sub> (right) units found in **18\_1** isomer.

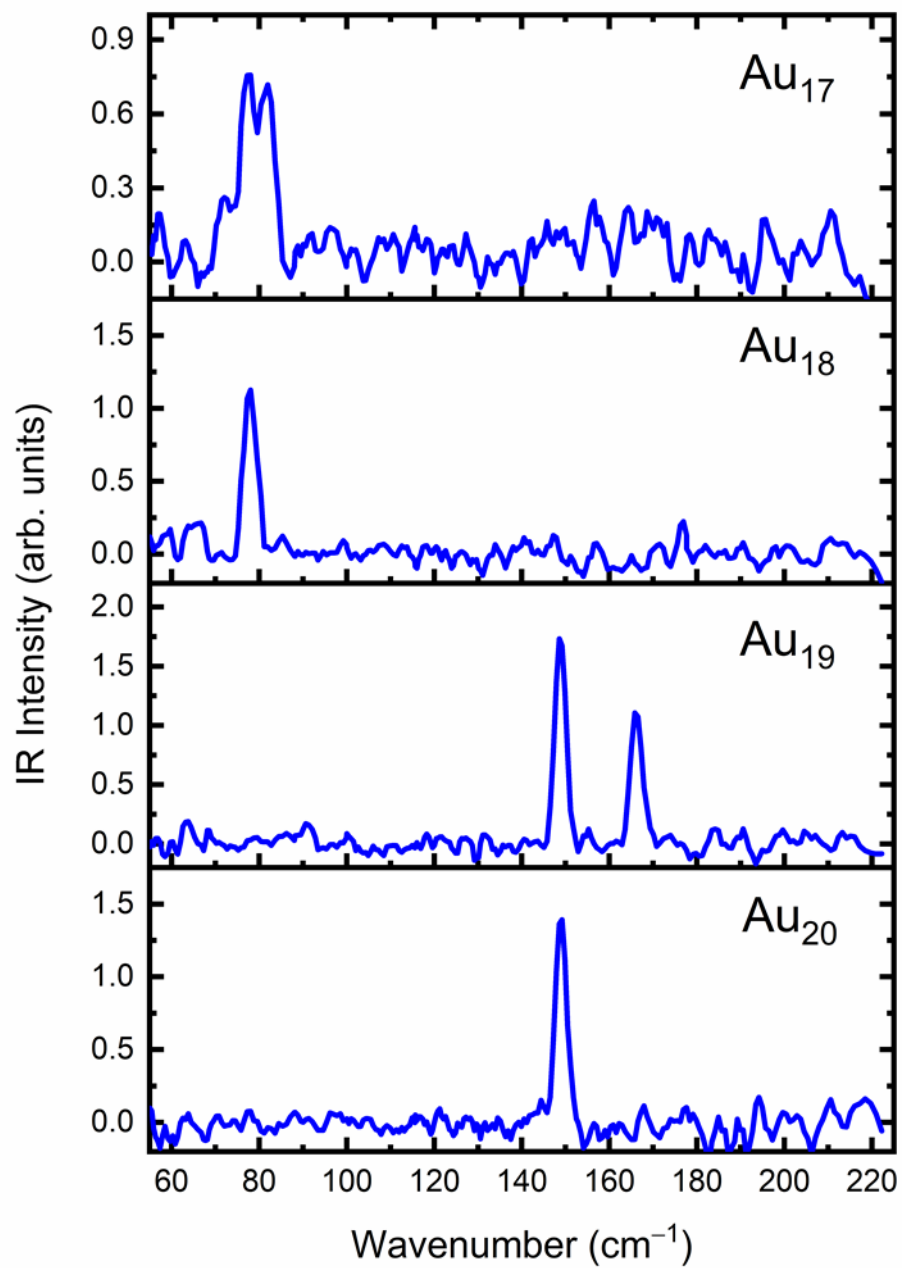

**Figure S2.** Experimental FIR-MPD of  $Au_n$ -Kr ( $n = 17 - 20$ ) clusters.

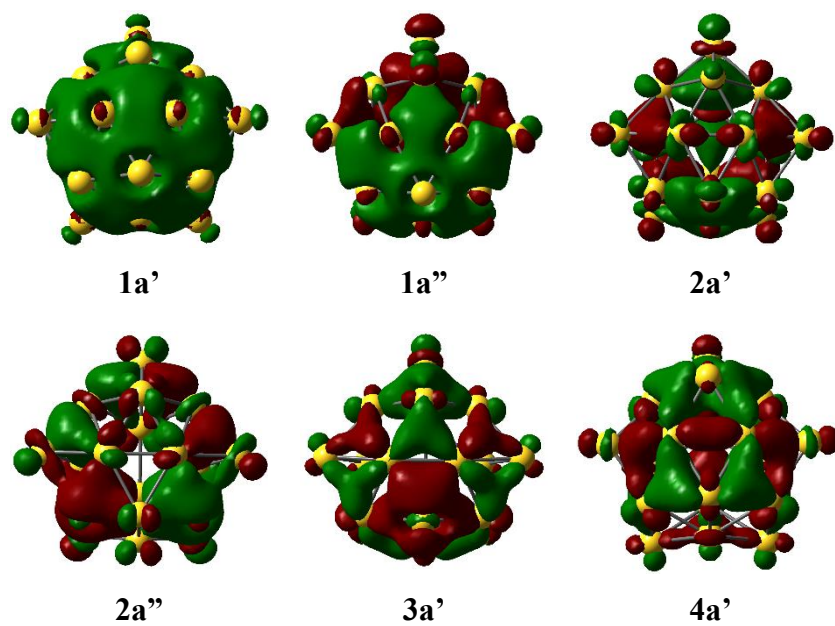

**Figure S3.** Shapes of orbitals in **18\_5** formed from orbital interactions between the Au<sub>17</sub> framework and the exohedral Au atom.

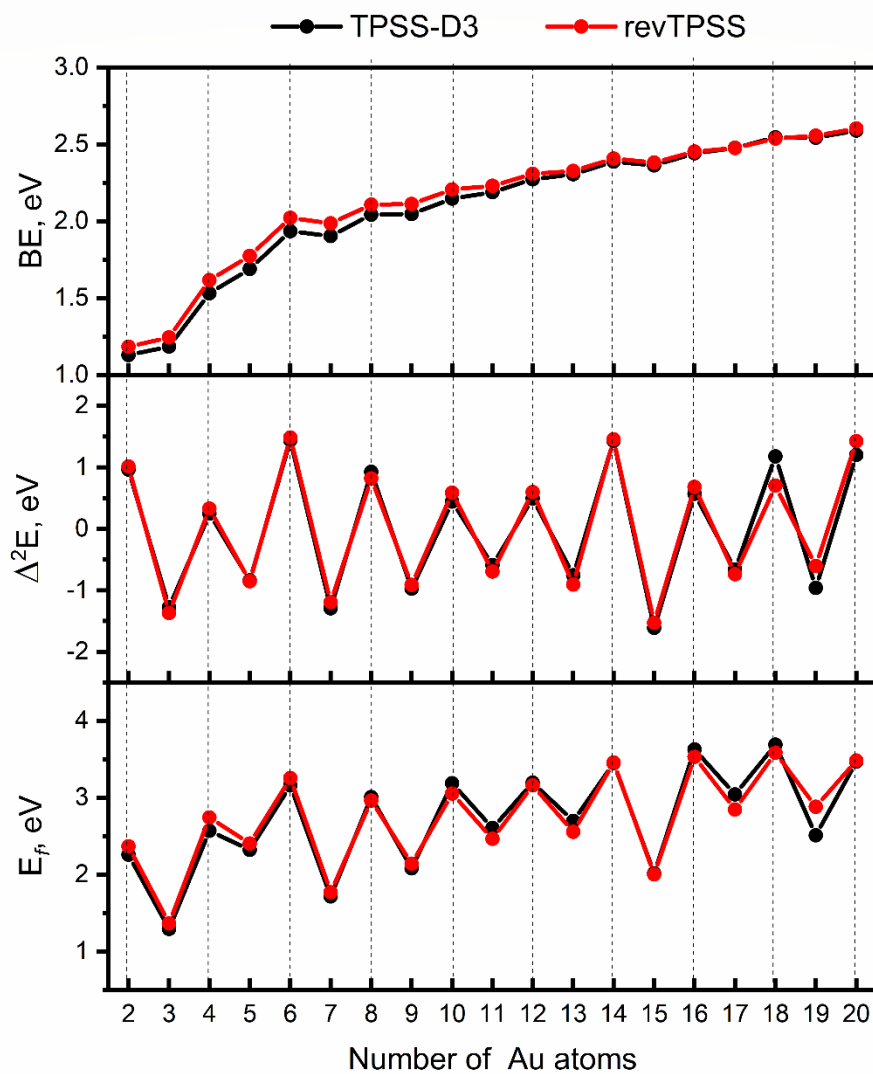

**Figure S4.** Binding energies per atom ( $E_b$ ), one-step fragmentation energies ( $E_f$ ) and second-order difference of energy ( $\Delta^2 E$ ) for neutral  $Au_n$  clusters as a function of cluster size. Results are obtained using both revTPSS and TPSS-D3 functionals.

**Table S1.** Vibrational frequencies ( $\text{cm}^{-1}$ ) of the most intense peaks in some small  $\text{Au}_n$  clusters at their equilibrium structures, computed with different functionals in comparison with experimental data.

| Method                   | Au <sub>2</sub> | Au <sub>7</sub> |       |       | Au <sub>19</sub> |       | Au <sub>20</sub> | RMSD <sup>b)</sup> |
|--------------------------|-----------------|-----------------|-------|-------|------------------|-------|------------------|--------------------|
|                          |                 | -----           | ----- | ----- | -----            | ----- |                  |                    |
| PW91                     | 173             | 155             | 175   | 188   | 135              | 152   | 137              | 13.2               |
| PBE                      | 172             | 154             | 174   | 186   | 135              | 153   | 136              | 13.9               |
| B3LYP                    | 166             | 145             | 163   | 177   | 122              | 144   | 125              | 23.5               |
| BLYP                     | 161             | 142             | 159   | 173   | 118              | 143   | 122              | 27.0               |
| TPSS                     | 178             | 159             | 180   | 193   | 144              | 160   | 144              | 7.4                |
| TPSS-D3                  | 176             | 158             | 179   | 192   | 141              | 160   | 142              | 8.8                |
| Experiment <sup>a)</sup> | 191             | 165             | 186   | 201   | 149              | 166   | 148              | -                  |

<sup>a)</sup> Taken from ref. S1. Value for Au<sub>2</sub> is taken from ref. S2

<sup>b)</sup> Root-mean-square deviations from experimental values.

**Table S2.** Low-lying isomers of the Au<sub>18</sub> cluster and their Cartesian coordinates (in Å)  
located using TPSS-D3/aVDZ-PP geometry optimizations.

| Isomer                                                                                                                               | Cartesian coordinates |              |              |              |
|--------------------------------------------------------------------------------------------------------------------------------------|-----------------------|--------------|--------------|--------------|
| 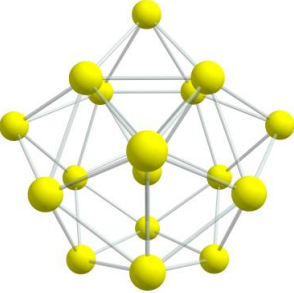 <p data-bbox="397 709 505 758"><b>18_1</b></p>     | 79                    | 0.256660000  | -0.000797000 | 3.150669000  |
|                                                                                                                                      | 79                    | -0.738454000 | -2.224518000 | -1.838007000 |
|                                                                                                                                      | 79                    | 0.837817000  | 3.504424000  | 0.000000000  |
|                                                                                                                                      | 79                    | 1.882760000  | 1.386305000  | 1.423766000  |
|                                                                                                                                      | 79                    | -0.720336000 | 2.231336000  | 1.837811000  |
|                                                                                                                                      | 79                    | 1.872302000  | -1.402836000 | -1.423390000 |
|                                                                                                                                      | 79                    | 1.872302000  | -1.402836000 | 1.423390000  |
|                                                                                                                                      | 79                    | 0.807599000  | -3.512146000 | 0.000000000  |
|                                                                                                                                      | 79                    | -2.358513000 | 0.009984000  | 2.106820000  |
|                                                                                                                                      | 79                    | -0.738454000 | -2.224518000 | 1.838007000  |
|                                                                                                                                      | 79                    | 3.765549000  | -0.014318000 | 0.000000000  |
|                                                                                                                                      | 79                    | -2.358513000 | 0.009984000  | -2.106820000 |
|                                                                                                                                      | 79                    | 0.256660000  | -0.000797000 | -3.150669000 |
|                                                                                                                                      | 79                    | -0.720336000 | 2.231336000  | -1.837811000 |
|                                                                                                                                      | 79                    | -2.719689000 | -1.745261000 | 0.000000000  |
|                                                                                                                                      | 79                    | -2.704910000 | 1.768114000  | 0.000000000  |
|                                                                                                                                      | 79                    | 1.882760000  | 1.386305000  | -1.423766000 |
|                                                                                                                                      | 79                    | -0.375205000 | 0.000238000  | 0.000000000  |
|  <p data-bbox="397 1367 505 1415"><b>18_2</b></p> | 79                    | 3.220200000  | -0.930680000 | 0.000000000  |
|                                                                                                                                      | 79                    | 0.387282000  | 0.076152000  | 0.000000000  |
|                                                                                                                                      | 79                    | -0.108900000 | 1.737709000  | 2.300167000  |
|                                                                                                                                      | 79                    | 2.493105000  | 1.325983000  | -1.477793000 |
|                                                                                                                                      | 79                    | 0.750236000  | 2.918239000  | 0.000000000  |
|                                                                                                                                      | 79                    | 1.612744000  | -1.242446000 | 2.229571000  |
|                                                                                                                                      | 79                    | 1.077618000  | -2.767320000 | 0.000000000  |
|                                                                                                                                      | 79                    | 2.493105000  | 1.325983000  | 1.477793000  |
|                                                                                                                                      | 79                    | -0.510924000 | -0.618219000 | 3.746494000  |
|                                                                                                                                      | 79                    | -1.125572000 | -1.866824000 | -1.393695000 |
|                                                                                                                                      | 79                    | -0.108900000 | 1.737709000  | -2.300167000 |
|                                                                                                                                      | 79                    | -1.125572000 | -1.866824000 | 1.393695000  |
|                                                                                                                                      | 79                    | 1.612744000  | -1.242446000 | -2.229571000 |
|                                                                                                                                      | 79                    | -0.510924000 | -0.618219000 | -3.746494000 |
|                                                                                                                                      | 79                    | -3.243486000 | -0.795171000 | 0.000000000  |
|                                                                                                                                      | 79                    | -1.833886000 | 1.840575000  | 0.000000000  |
|                                                                                                                                      | 79                    | -2.539435000 | 0.492899000  | -2.272614000 |
|                                                                                                                                      | 79                    | -2.539435000 | 0.492899000  | 2.272614000  |
|                                                                                                                                      | 79                    | -1.972593000 | 1.384024000  | 0.289269000  |
|                                                                                                                                      | 79                    | 1.393290000  | -2.380523000 | -2.205929000 |
|                                                                                                                                      | 79                    | 1.972593000  | -1.384024000 | 0.289269000  |
|                                                                                                                                      | 79                    | 0.000000000  | -1.731438000 | 2.197396000  |
|                                                                                                                                      | 79                    | -1.393290000 | -2.380523000 | -2.205929000 |

|                                                                                                                                    |             |              |              |              |
|------------------------------------------------------------------------------------------------------------------------------------|-------------|--------------|--------------|--------------|
| 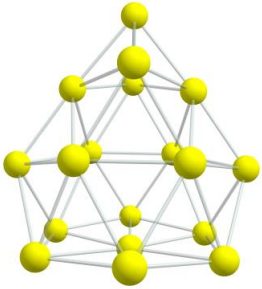 <p style="text-align: center;"><b>18_3</b></p>   | 79          | -1.972593000 | -1.384024000 | 0.289269000  |
|                                                                                                                                    | 79          | -2.157789000 | 0.000000000  | 2.615069000  |
|                                                                                                                                    | 79          | 2.731666000  | 0.000000000  | -1.981623000 |
|                                                                                                                                    | 79          | -1.393290000 | 2.380523000  | -2.205929000 |
|                                                                                                                                    | 79          | -2.731666000 | 0.000000000  | -1.981623000 |
|                                                                                                                                    | 79          | 0.000000000  | 1.731438000  | 2.197396000  |
|                                                                                                                                    | 79          | 0.000000000  | 3.275468000  | 0.003706000  |
|                                                                                                                                    | 79          | 2.157789000  | 0.000000000  | 2.615069000  |
|                                                                                                                                    | 79          | 0.000000000  | -3.275468000 | 0.003706000  |
|                                                                                                                                    | 79          | 0.000000000  | 0.000000000  | -2.329379000 |
|                                                                                                                                    | 79          | 1.393290000  | 2.380523000  | -2.205929000 |
|                                                                                                                                    | 79          | 1.972593000  | 1.384024000  | 0.289269000  |
|                                                                                                                                    | 79          | 0.000000000  | 0.000000000  | 4.326925000  |
|  <p style="text-align: center;"><b>18_4</b></p>   | 79          | -0.187964000 | -0.136867000 | 3.423670000  |
|                                                                                                                                    | 79          | -0.187964000 | -0.136867000 | -3.423670000 |
|                                                                                                                                    | 79          | -0.612618000 | 2.006873000  | 1.864402000  |
|                                                                                                                                    | 79          | -0.612618000 | 2.006873000  | -1.864402000 |
|                                                                                                                                    | 79          | -0.817819000 | 4.005404000  | 0.000000000  |
|                                                                                                                                    | 79          | -1.961743000 | -0.374375000 | 1.363197000  |
|                                                                                                                                    | 79          | -2.624718000 | 1.871318000  | 0.000000000  |
|                                                                                                                                    | 79          | -1.961743000 | -0.374375000 | -1.363197000 |
|                                                                                                                                    | 79          | -0.652004000 | -2.608443000 | -2.354984000 |
|                                                                                                                                    | 79          | -2.033279000 | -2.779988000 | 0.000000000  |
|                                                                                                                                    | 79          | -0.652004000 | -2.608443000 | 2.354984000  |
|                                                                                                                                    | 79          | 1.428718000  | 2.450499000  | 0.000000000  |
|                                                                                                                                    | 79          | 1.989625000  | 1.197021000  | 2.353523000  |
|                                                                                                                                    | 79          | 1.989625000  | 1.197021000  | -2.353523000 |
|                                                                                                                                    | 79          | 0.755173000  | -2.432970000 | 0.000000000  |
|                                                                                                                                    | 79          | 2.304186000  | -0.147550000 | 0.000000000  |
|                                                                                                                                    | 79          | 1.918574000  | -1.567565000 | 2.287200000  |
| 79                                                                                                                                 | 1.918574000 | -1.567565000 | -2.287200000 |              |
|  <p style="text-align: center;"><b>18_5</b></p> | 79          | -0.434786000 | -2.862584000 | 0.000000000  |
|                                                                                                                                    | 79          | 1.531562000  | 3.788108000  | 0.000000000  |
|                                                                                                                                    | 79          | 1.386799000  | -0.296271000 | 2.267128000  |
|                                                                                                                                    | 79          | 1.186141000  | -3.031325000 | -2.201280000 |
|                                                                                                                                    | 79          | 2.058477000  | -1.594537000 | 0.000000000  |
|                                                                                                                                    | 79          | -1.183180000 | -1.583880000 | 2.273479000  |
|                                                                                                                                    | 79          | -2.715622000 | -1.358128000 | 0.000000000  |
|                                                                                                                                    | 79          | 1.186141000  | -3.031325000 | 2.201280000  |
|                                                                                                                                    | 79          | -0.742745000 | 0.639482000  | 3.809093000  |
|                                                                                                                                    | 79          | -1.860870000 | 0.889565000  | -1.335677000 |
|                                                                                                                                    | 79          | 1.386799000  | -0.296271000 | -2.267128000 |
|                                                                                                                                    | 79          | -1.860870000 | 0.889565000  | 1.335677000  |
|                                                                                                                                    | 79          | -1.183180000 | -1.583880000 | -2.273479000 |
|                                                                                                                                    | 79          | -0.742745000 | 0.639482000  | -3.809093000 |
|                                                                                                                                    | 79          | -1.185037000 | 3.148162000  | 0.000000000  |



|                                                                                                                                   |              |              |              |              |
|-----------------------------------------------------------------------------------------------------------------------------------|--------------|--------------|--------------|--------------|
|                                                                                                                                   | 79           | 2.056649000  | 1.103473000  | 0.000000000  |
|                                                                                                                                   | 79           | 0.558234000  | 2.270182000  | -2.030978000 |
|                                                                                                                                   | 79           | 0.558234000  | 2.270182000  | 2.030978000  |
| 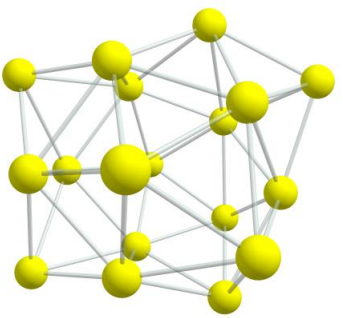 <p style="text-align: center;"><b>18_6</b></p>  | 79           | 0.114121000  | -0.423473000 | 3.120924000  |
|                                                                                                                                   | 79           | -1.875539000 | -1.299728000 | -1.428727000 |
|                                                                                                                                   | 79           | 2.780466000  | 1.954571000  | 0.000000000  |
|                                                                                                                                   | 79           | 2.248897000  | -0.295758000 | 1.413560000  |
|                                                                                                                                   | 79           | 0.688566000  | 1.900425000  | 1.849055000  |
|                                                                                                                                   | 79           | 0.583286000  | -2.488523000 | -1.413798000 |
|                                                                                                                                   | 79           | 0.583286000  | -2.488523000 | 1.413798000  |
|                                                                                                                                   | 79           | -1.526168000 | -3.574069000 | 0.000000000  |
|                                                                                                                                   | 79           | -1.953836000 | 1.235134000  | 2.350974000  |
|                                                                                                                                   | 79           | -1.875539000 | -1.299728000 | 1.428727000  |
|                                                                                                                                   | 79           | 2.932172000  | -2.555842000 | 0.000000000  |
|                                                                                                                                   | 79           | -1.953836000 | 1.235134000  | -2.350974000 |
|                                                                                                                                   | 79           | 0.114121000  | -0.423473000 | -3.120924000 |
|                                                                                                                                   | 79           | 0.688566000  | 1.900425000  | -1.849055000 |
|                                                                                                                                   | 79           | -3.297934000 | 0.543447000  | 0.000000000  |
|                                                                                                                                   | 79           | -1.348935000 | 2.435694000  | 0.000000000  |
| 79                                                                                                                                | 2.248897000  | -0.295758000 | -1.413560000 |              |
| 79                                                                                                                                | 0.849407000  | 3.940044000  | 0.000000000  |              |
|  <p style="text-align: center;"><b>18_7</b></p> | 79           | 3.318086000  | -0.164022000 | 1.371145000  |
|                                                                                                                                   | 79           | 1.235884000  | -1.454442000 | 2.678568000  |
|                                                                                                                                   | 79           | -0.804886000 | -2.677792000 | 1.476071000  |
|                                                                                                                                   | 79           | -0.804886000 | -2.677792000 | -1.476071000 |
|                                                                                                                                   | 79           | 1.235884000  | -1.454442000 | -2.678568000 |
|                                                                                                                                   | 79           | 3.318086000  | -0.164022000 | -1.371145000 |
|                                                                                                                                   | 79           | 1.433704000  | -1.762855000 | 0.000000000  |
|                                                                                                                                   | 79           | 1.446464000  | 1.372646000  | 2.696438000  |
|                                                                                                                                   | 79           | 1.219617000  | 1.181532000  | 0.000000000  |
|                                                                                                                                   | 79           | 1.446464000  | 1.372646000  | -2.696438000 |
|                                                                                                                                   | 79           | -0.919167000 | 0.068561000  | 1.785377000  |
|                                                                                                                                   | 79           | -2.687221000 | -1.131340000 | 0.000000000  |
|                                                                                                                                   | 79           | -0.919167000 | 0.068561000  | -1.785377000 |
|                                                                                                                                   | 79           | -0.530618000 | 2.783836000  | -1.568850000 |
|                                                                                                                                   | 79           | -0.530618000 | 2.783836000  | 1.568850000  |
|                                                                                                                                   | 79           | -2.532776000 | 1.496187000  | 0.000000000  |
| 79                                                                                                                                | -2.737123000 | -3.828175000 | 0.000000000  |              |
| 79                                                                                                                                | -2.187726000 | 4.187077000  | 0.000000000  |              |

## References

- S1. P. Gruene, D. M. Rayner, B. Redlich, A. F. van der Meer, J. T. Lyon, G. Meijer and A. Fielicke, *Science*, 2008, **321**, 674-676.
- S2. M. D. Morse, *Chem. Rev.*, 1986, **86**, 1049-1109.
